# Supplementary material for: Kinetic and thermodynamic studies on the cyanation reactions and base-on/base-off equilibria of alkyl-13-epicobalamins
Source: Royal Society of Chemistry journal article supplement (doi:10.1039/b304069k), 2003-01-01
Supplement: b304069k.doc [file b304069k.doc]

## Supporting Information

#### Kinetic and thermodynamic studies on the cyanation reactions and

#### base-on/base-off equilibria of alkyl-13-epicobalamins

Mohamed S.A. Hamza, Xiang Zou, Kenneth L. Brown and Rudi van Eldik*

**Fig. S1**. UV-Vis spectra of -NCCH2-13-epiCbl ( ), after addition of 0.4 M CN- at pH 11.0 (-------), and then after photolysis (........).

**Fig. S2**. Plot of kobs versus [HClO4] for the acidification of CN-13-epiCbl at 30.0 oC and I = 2 M (NaClO4); the solid line is a fit to equation (4) in the text.

**Fig. S3**. Change in absorbance at 580 nm on addition of CN- to CN-13-epiCbl at pH 11.0, 30.0 oC; the solid line is a fit to equation (5) in the text and results in KCN1 = 350  25 M-1.

###### Figure SI-1

###### Figure SI-2

###### Figure SI-3
